# Supplementary material for: Insulin-like growth factor binding proteins 4 and 7 released by senescent cells promote premature senescence in mesenchymal stem cells
Source: PubMed Central journal article supplement — Cell Death Dis. 2013 Nov 7;4(11):e911–. doi: 10.1038/cddis.2013.445 (PMC3847322; doi:10.1038/cddis.2013.445), 2013-11-07
Supplement: cddis2013445x3.pdf [file cddis2013445x3.pdf]

Supplementary information  
Table S1. List of peptides identified by LC-MS/MS in the CM-P1 secretome

Search Engine: Mascot  
Version: 2.2.0  
Samples: All Samples  
Fragment Tolerance: 0.60 Da (Monoisotopic)  
Parent Tolerance: 25 PM (Monoisotopic)  
Fixed Modifications: +57 on C (Carbamidomethyl)  
Variable Modifications: +16 on M (Oxidation)  
Database: db.uniprot\_sprot\_release\_2011\_09\_at\_21-Sep-2011 database (selected for Homo sapiens, unknown version, 20323 entries)  
Digestion Enzyme: Trypsin  
Max Missed Cleavages: 1  
Scaffold: Veneta; Scaffold\_4.0.1  
Peptide Thresholds: 95.0% minimum  
Protein Thresholds: 95.0% minimum and 2 peptides minimum

| Protein name                             | Protein AC | Protein Mw (Da) | Protein identification probability | Number of unique peptides | Number of unique spectra | Number of total spectra | Percentage of total spectra | Percentage sequence coverage | Peptide sequence             | Previous amino acid | Next amino acid | Best Peptide identification probability | Best Mascot ion score | Best Mascot Identity score | Number of identified +1H spectra | Number of identified +2H spectra | Number of identified +3H spectra | Number of identified +4H spectra | Number of enzymatic termini | Calculated +1H Peptide Mass (AMU) | Peptide start index | Peptide stop index |
|------------------------------------------|------------|-----------------|------------------------------------|---------------------------|--------------------------|-------------------------|-----------------------------|------------------------------|------------------------------|---------------------|-----------------|-----------------------------------------|-----------------------|----------------------------|----------------------------------|----------------------------------|----------------------------------|----------------------------------|-----------------------------|-----------------------------------|---------------------|--------------------|
| 72 kDa type IV collagenase               | P08253     | 73885.1         | 100.00%                            | 9                         | 9                        | 10                      | 0.08%                       | 16.70%                       | AFQWSDVTLR                   | R                   | F               | 99.70%                                  | 45.5                  | 26.3                       | 0                                | 1                                | 0                                | 0                                | 2                           | 1418.7427                         | 147                 | 158                |
| 72 kDa type IV collagenase               | P08253     | 73885.1         | 100.00%                            | 9                         | 9                        | 10                      | 0.08%                       | 16.70%                       | ELAVQVNTFYGGPK               | K                   | E               | 99.70%                                  | 55.6                  | 25                         | 0                                | 1                                | 0                                | 0                                | 2                           | 1802.8783                         | 48                  | 62                 |
| 72 kDa type IV collagenase               | P08253     | 73885.1         | 100.00%                            | 9                         | 9                        | 10                      | 0.08%                       | 16.70%                       | DAVAYARPEEK                  | K                   | A               | 99.70%                                  | 49.3                  | 25.5                       | 0                                | 2                                | 0                                | 0                                | 2                           | 1391.6890                         | 520                 | 531                |
| 72 kDa type IV collagenase               | P08253     | 73885.1         | 100.00%                            | 9                         | 9                        | 10                      | 0.08%                       | 16.70%                       | IGYPTDLDPETVDDAFAR           | R                   | A               | 99.70%                                  | 86.3                  | 25                         | 0                                | 0                                | 0                                | 0                                | 2                           | 2108.0186                         | 128                 | 146                |
| 72 kDa type IV collagenase               | P08253     | 73885.1         | 100.00%                            | 9                         | 9                        | 10                      | 0.08%                       | 16.70%                       | LSQDDIK                      | R                   | G               | 99.70%                                  | 32                    | 27.2                       | 0                                | 1                                | 0                                | 0                                | 2                           | 816.4256                          | 433                 | 439                |
| 72 kDa type IV collagenase               | P08253     | 73885.1         | 100.00%                            | 9                         | 9                        | 10                      | 0.08%                       | 16.70%                       | QDVDFYGAQGR                  | K                   | G               | 99.70%                                  | 61.6                  | 25.3                       | 0                                | 1                                | 0                                | 0                                | 2                           | 1374.7378                         | 471                 | 482                |
| 72 kDa type IV collagenase               | P08253     | 73885.1         | 100.00%                            | 9                         | 9                        | 10                      | 0.08%                       | 16.70%                       | SDGFVLCSTTYTFEK              | R                   | D               | 99.70%                                  | 39                    | 25                         | 0                                | 0                                | 0                                | 0                                | 2                           | 1854.8004                         | 253                 | 267                |
| 72 kDa type IV collagenase               | P08253     | 73885.1         | 100.00%                            | 9                         | 9                        | 10                      | 0.08%                       | 16.70%                       | VDAPFNWSK                    | R                   | N               | 99.70%                                  | 25.5                  | 25.6                       | 0                                | 1                                | 0                                | 0                                | 2                           | 1037.5050                         | 568                 | 576                |
| 72 kDa type IV collagenase               | P08253     | 73885.1         | 100.00%                            | 9                         | 9                        | 10                      | 0.08%                       | 16.70%                       | WQDKQTYR                     | K                   | I               | 99.20%                                  | 21.8                  | 26.6                       | 0                                | 0                                | 0                                | 0                                | 2                           | 1223.6168                         | 119                 | 127                |
| 78 kDa glucose-regulated protein         | P11021     | 72334.7         | 100.00%                            | 4                         | 4                        | 4                       | 0.03%                       | 8.56%                        | ELEEIVQHSK                   | K                   | L               | 99.70%                                  | 41.5                  | 25                         | 0                                | 0                                | 0                                | 0                                | 2                           | 1397.7888                         | 622                 | 633                |
| 78 kDa glucose-regulated protein         | P11021     | 72334.7         | 100.00%                            | 4                         | 4                        | 4                       | 0.03%                       | 8.56%                        | NQLTSPENYVDAK                | K                   | R               | 99.70%                                  | 64.9                  | 25.1                       | 0                                | 1                                | 0                                | 0                                | 2                           | 1677.8079                         | 82                  | 96                 |
| 78 kDa glucose-regulated protein         | P11021     | 72334.7         | 100.00%                            | 4                         | 4                        | 4                       | 0.03%                       | 8.56%                        | SOFTASDQNTPTVTK              | K                   | V               | 99.70%                                  | 62.6                  | 25.1                       | 0                                | 1                                | 0                                | 0                                | 2                           | 1836.9338                         | 448                 | 464                |
| 78 kDa glucose-regulated protein         | P11021     | 72334.7         | 100.00%                            | 4                         | 4                        | 4                       | 0.03%                       | 8.56%                        | TWNPDSVQDQIK                 | R                   | F               | 99.70%                                  | 56                    | 25.4                       | 0                                | 0                                | 0                                | 0                                | 2                           | 1430.6912                         | 102                 | 113                |
| Annexin A2                               | P07355     | 38606.1         | 100.00%                            | 7                         | 7                        | 8                       | 0.07%                       | 23.30%                       | AEDGSVIDVELDDQAR             | R                   | D               | 99.70%                                  | 39                    | 25                         | 0                                | 1                                | 0                                | 0                                | 2                           | 1908.8824                         | 180                 | 196                |
| Annexin A2                               | P07355     | 38606.1         | 100.00%                            | 7                         | 7                        | 8                       | 0.07%                       | 23.30%                       | DISDTSQGR                    | K                   | K               | 99.70%                                  | 53.5                  | 25                         | 0                                | 0                                | 0                                | 0                                | 2                           | 1225.5697                         | 158                 | 168                |
| Annexin A2                               | P07355     | 38606.1         | 100.00%                            | 7                         | 7                        | 8                       | 0.07%                       | 23.30%                       | GLTDDSDSLIEICSR              | K                   | T               | 99.70%                                  | 59                    | 25.3                       | 0                                | 0                                | 0                                | 0                                | 2                           | 1777.8640                         | 120                 | 135                |
| Annexin A2                               | P07355     | 38606.1         | 100.00%                            | 7                         | 7                        | 8                       | 0.07%                       | 23.30%                       | QVDEVTIVNLNTR                | K                   | S               | 99.70%                                  | 59.2                  | 25                         | 0                                | 1                                | 0                                | 0                                | 2                           | 1542.8487                         | 50                  | 63                 |
| Annexin A2                               | P07355     | 38606.1         | 100.00%                            | 7                         | 7                        | 8                       | 0.07%                       | 23.30%                       | QDVAFYR                      | R                   | R               | 99.70%                                  | 36                    | 25.3                       | 0                                | 2                                | 0                                | 0                                | 2                           | 1111.5531                         | 69                  | 77                 |
| Annexin A2                               | P07355     | 38606.1         | 100.00%                            | 7                         | 7                        | 8                       | 0.07%                       | 23.30%                       | RAEDGSVIDVELDDQAR            | R                   | D               | 99.70%                                  | 61.5                  | 25                         | 0                                | 0                                | 1                                | 0                                | 2                           | 2064.9835                         | 179                 | 196                |
| Annexin A2                               | P07355     | 38606.1         | 100.00%                            | 7                         | 7                        | 8                       | 0.07%                       | 23.30%                       | SLYVYQQDTK                   | K                   | G               | 99.70%                                  | 48.5                  | 25.7                       | 0                                | 0                                | 0                                | 0                                | 2                           | 1421.6948                         | 314                 | 324                |
| Bglycan                                  | P21810     | 41655.9         | 100.00%                            | 6                         | 6                        | 6                       | 0.05%                       | 16.30%                       | EISPTDTLLQDNNDISELRK         | R                   | K               | 99.10%                                  | 25.9                  | 25                         | 0                                | 1                                | 0                                | 0                                | 2                           | 2286.1463                         | 87                  | 106                |
| Bglycan                                  | P21810     | 41655.9         | 100.00%                            | 6                         | 6                        | 6                       | 0.05%                       | 16.30%                       | ELVIEDELLR                   | K                   | Y               | 99.70%                                  | 17                    | 25                         | 0                                | 0                                | 0                                | 0                                | 2                           | 2414.2413                         | 87                  | 107                |
| Bglycan                                  | P21810     | 41655.9         | 100.00%                            | 6                         | 6                        | 6                       | 0.05%                       | 16.30%                       | LAIGFQWK                     | K                   | L               | 99.70%                                  | 57.3                  | 25                         | 0                                | 0                                | 0                                | 0                                | 2                           | 1312.7473                         | 241                 | 251                |
| Bglycan                                  | P21810     | 41655.9         | 100.00%                            | 6                         | 6                        | 6                       | 0.05%                       | 16.30%                       | VPSGLPDLK                    | R                   | L               | 99.30%                                  | 26.6                  | 25                         | 0                                | 1                                | 0                                | 0                                | 2                           | 1053.5728                         | 359                 | 367                |
| Bglycan                                  | P21810     | 41655.9         | 100.00%                            | 6                         | 6                        | 6                       | 0.05%                       | 16.30%                       | VQVCSDLGLK                   | R                   | S               | 99.70%                                  | 37                    | 26.1                       | 0                                | 1                                | 0                                | 0                                | 2                           | 925.5355                          | 292                 | 300                |
| Bone morphogenetic protein 1             | P13497     | 111249.3        | 99.80%                             | 2                         | 2                        | 2                       | 0.02%                       | 2.74%                        | AAALQDAVALDEDLR              | K                   | S               | 99.70%                                  | 31.5                  | 25                         | 0                                | 0                                | 0                                | 0                                | 2                           | 1116.5876                         | 73                  | 82                 |
| Bone morphogenetic protein 1             | P13497     | 111249.3        | 99.80%                             | 2                         | 2                        | 2                       | 0.02%                       | 2.74%                        | AFQVQQAQDLR                  | K                   | R               | 99.70%                                  | 60.1                  | 26.1                       | 0                                | 0                                | 0                                | 0                                | 2                           | 1274.6852                         | 65                  | 75                 |
| Calreticulin                             | P27797     | 48142.9         | 100.00%                            | 3                         | 3                        | 3                       | 0.03%                       | 9.83%                        | EQFLDDQWTSR                  | K                   | W               | 99.70%                                  | 35.9                  | 25                         | 0                                | 1                                | 0                                | 0                                | 2                           | 1410.6286                         | 25                  | 36                 |
| Calreticulin                             | P27797     | 48142.9         | 100.00%                            | 3                         | 3                        | 3                       | 0.03%                       | 9.83%                        | FYLAASAFPSNKK                | K                   | R               | 99.70%                                  | 26.8                  | 25                         | 0                                | 0                                | 0                                | 0                                | 2                           | 1607.7739                         | 14                  | 24                 |
| Calreticulin                             | P27797     | 48142.9         | 100.00%                            | 3                         | 3                        | 3                       | 0.03%                       | 9.83%                        | KQPDASKPREDWDER              | K                   | A               | 97.50%                                  | 17.4                  | 25                         | 0                                | 0                                | 0                                | 0                                | 2                           | 1800.8402                         | 208                 | 222                |
| Calumenin                                | Q43852     | 37107.7         | 100.00%                            | 6                         | 7                        | 7                       | 0.06%                       | 18.70%                       | DWILPSDYHAEAEAR              | K                   | H               | 99.70%                                  | 59.2                  | 25                         | 0                                | 1                                | 0                                | 0                                | 2                           | 1887.8509                         | 256                 | 271                |
| Calumenin                                | Q43852     | 37107.7         | 100.00%                            | 6                         | 7                        | 7                       | 0.06%                       | 18.70%                       | EQPVER                       | R                   | R               | 99.70%                                  | 26.8                  | 25                         | 0                                | 0                                | 0                                | 0                                | 2                           | 954.4679                          | 245                 | 249                |
| Calumenin                                | Q43852     | 37107.7         | 100.00%                            | 6                         | 7                        | 7                       | 0.06%                       | 18.70%                       | IQGDQGYVTVDELK               | K                   | D               | 99.70%                                  | 67                    | 25.5                       | 0                                | 1                                | 0                                | 0                                | 2                           | 1650.8225                         | 80                  | 94                 |
| Calumenin                                | Q43852     | 37107.7         | 100.00%                            | 6                         | 7                        | 7                       | 0.06%                       | 18.70%                       | TFDQLTPEESK                  | K                   | E               | 99.70%                                  | 41.9                  | 25.6                       | 0                                | 0                                | 0                                | 0                                | 2                           | 1294.6163                         | 60                  | 70                 |
| Calumenin                                | Q43852     | 37107.7         | 100.00%                            | 6                         | 7                        | 7                       | 0.06%                       | 18.70%                       | TFDQLTPEESK                  | K                   | E               | 99.70%                                  | 25                    | 27                         | 0                                | 0                                | 0                                | 0                                | 2                           | 1579.7000                         | 707                 | 717                |
| Calumenin                                | Q43852     | 37107.7         | 100.00%                            | 6                         | 7                        | 7                       | 0.06%                       | 18.70%                       | WYEDVER                      | R                   | Q               | 99.70%                                  | 31.2                  | 25                         | 0                                | 0                                | 0                                | 0                                | 2                           | 1109.5262                         | 104                 | 111                |
| Coiled-coil domain-containing protein 80 | Q7M9M6     | 108176.4        | 100.00%                            | 5                         | 5                        | 5                       | 0.04%                       | 7.47%                        | ASGVGEQVVAEGNDGGGAGRPRLSGEK  | K                   | K               | 99.70%                                  | 39.4                  | 25                         | 0                                | 1                                | 0                                | 0                                | 2                           | 2542.2131                         | 283                 | 310                |
| Coiled-coil domain-containing protein 80 | Q7M9M6     | 108176.4        | 100.00%                            | 5                         | 5                        | 5                       | 0.04%                       | 7.47%                        | LLUUTAR                      | K                   | K               | 99.70%                                  | 29                    | 25                         | 0                                | 0                                | 0                                | 0                                | 2                           | 866.5868                          | 625                 | 631                |
| Coiled-coil domain-containing protein 80 | Q7M9M6     | 108176.4        | 100.00%                            | 5                         | 5                        | 5                       | 0.04%                       | 7.47%                        | SVADLLSFGSK                  | K                   | R               | 99.70%                                  | 71                    | 26.1                       | 0                                | 1                                | 0                                | 0                                | 2                           | 1222.6315                         | 611                 | 622                |
| Coiled-coil domain-containing protein 80 | Q7M9M6     | 108176.4        | 100.00%                            | 5                         | 5                        | 5                       | 0.04%                       | 7.47%                        | SFVDLDTFSK                   | K                   | I               | 99.70%                                  | 48.7                  | 25.6                       | 0                                | 0                                | 0                                | 0                                | 2                           | 1427.7166                         | 735                 | 746                |
| Collagen alpha-1(I) chain                | P02452     | 138941.4        | 100.00%                            | 48                        | 48                       | 60                      | 0.60%                       | 45.90%                       | VVDVDDTQPK                   | K                   | R               | 99.70%                                  | 45                    | 26                         | 0                                | 0                                | 0                                | 0                                | 2                           | 1302.6174                         | 1387                | 1399               |
| Collagen alpha-1(I) chain                | P02452     | 138941.4        | 100.00%                            | 48                        | 48                       | 60                      | 0.60%                       | 45.90%                       | ALLQSSNEIR                   | K                   | A               | 99.70%                                  | 63.7                  | 25                         | 0                                | 2                                | 0                                | 0                                | 2                           | 1455.8167                         | 1387                | 1399               |
| Collagen alpha-1(I) chain                | P02452     | 138941.4        | 100.00%                            | 48                        | 48                       | 60                      | 0.60%                       | 45.90%                       | DGGAAGAGPPGAPGAPAGER         | K                   | G               | 99.70%                                  | 51.2                  | 25                         | 0                                | 0                                | 0                                | 0                                | 2                           | 1660.7793                         | 613                 | 631                |
| Collagen alpha-1(I) chain                | P02452     | 138941.4        | 100.00%                            | 48                        | 48                       | 60                      | 0.60%                       | 45.90%                       | DGLVLPQGPQPPR                | K                   | G               | 99.70%                                  | 22.7                  | 25.7                       | 0                                | 0                                | 0                                | 0                                | 2                           | 1519.8126                         | 1153                | 1168               |
| Collagen alpha-1(I) chain                | P02452     | 138941.4        | 100.00%                            | 48                        | 48                       | 60                      | 0.60%                       | 45.90%                       | DLEVTDTLK                    | R                   | S               | 99.60%                                  | 29.4                  | 26.8                       | 0                                | 1                                | 0                                | 0                                | 2                           | 1033.5414                         | 1228                | 1236               |
| Collagen alpha-1(I) chain                | P02452     | 138941.4        | 100.00%                            | 48                        | 48                       | 60                      | 0.60%                       | 45.90%                       | FDLEVTDTLK                   | R                   | S               | 99.70%                                  | 42.3                  | 26.4                       | 0                                | 1                                | 0                                | 0                                | 2                           | 1304.6695                         | 1226                | 1236               |
| Collagen alpha-1(I) chain                | P02452     | 138941.4        | 100.00%                            | 48                        | 48                       | 60                      | 0.60%                       | 45.90%                       | EDAPGASQGR                   | K                   | G               | 99.70%                                  | 26.5                  | 26.0                       | 0                                | 1                                | 0                                | 0                                | 2                           | 1084.5019                         | 1015                | 1026               |
| Collagen alpha-1(I) chain                | P02452     | 138941.4        | 100.00%                            | 48                        | 48                       | 60                      | 0.60%                       | 45.90%                       | FRTYSVTDQCTSHTGAWK           | R                   | T               | 99.70%                                  | 27.1                  | 25                         | 0                                | 0                                | 0                                | 0                                | 2                           | 2073.3336                         | 1406                | 1424               |
| Collagen alpha-1(I) chain                | P02452     | 138941.4        | 100.00%                            | 48                        | 48                       | 60                      | 0.60%                       | 45.90%                       | GANGAGPAGAGPQFQAR            | K                   | G               | 99.70%                                  | 34.5                  | 25.4                       | 0                                | 1                                | 0                                | 0                                | 2                           | 1537.7872                         | 398                 | 415                |
| Collagen alpha-1(I) chain                | P02452     | 138941.4        | 100.00%                            | 48                        | 48                       | 60                      | 0.60%                       | 45.90%                       | GAPDGGEGPQPPGAPAGAPAGDQGGPAK | K                   | G               | 99.70%                                  | 65                    | 25                         | 0                                | 0                                | 0                                | 2                                | 2639.2604                   | 707                               | 717                 |                    |
| Collagen alpha-1(I) chain                | P02452     | 138941.4        | 100.00%                            | 48                        | 4                        |                         |                             |                              |                              |                     |                 |                                         |                       |                            |                                  |                                  |                                  |                                  |                             |                                   |                     |                    |

| Protein name               | Protein AC | Protein Mw (Da) | Protein Identification probability | Number of unique peptides | Number of unique spectra | Number of total spectra | Percentage of total spectra | Percentage sequence coverage | Peptide sequence                   | Previous amino acid | Next amino acid | Best Peptide Identification probability | Best Mascot Ion score | Best Mascot Identity score | Number of identified +H spectra | Number of identified +2H spectra | Number of identified +3H spectra | Number of identified +4H spectra | Number of enzymatic termini | Calculated +1H Peptide Mass (AMU) | Peptide start index | Peptide stop index |
|----------------------------|------------|-----------------|------------------------------------|---------------------------|--------------------------|-------------------------|-----------------------------|------------------------------|------------------------------------|---------------------|-----------------|-----------------------------------------|-----------------------|----------------------------|---------------------------------|----------------------------------|----------------------------------|----------------------------------|-----------------------------|-----------------------------------|---------------------|--------------------|
| Collagen alpha-1(XI) chain | O98715     | 333145.3        | 100.00%                            | 29                        | 31                       | 33                      | 0.33%                       | 12.20%                       | DYKFGQVGVADPSSK                    | R                   | T               | 99.50%                                  | 27.2                  | 25.3                       | 0                               | 1                                | 1                                | 0                                | 2                           | 1603.8328                         | 2603                | 2617               |
| Collagen alpha-1(XI) chain | O98715     | 333145.3        | 100.00%                            | 29                        | 31                       | 33                      | 0.33%                       | 12.20%                       | GDTNTVLVDGLK                       | R                   | D               | 99.70%                                  | 64.6                  | 26.5                       | 0                               | 1                                | 0                                | 2                                | 1240.6840                   | 863                               | 874                 |                    |
| Collagen alpha-1(XI) chain | O98715     | 333145.3        | 100.00%                            | 29                        | 31                       | 33                      | 0.33%                       | 12.20%                       | GEVTVTFVTEADK                      | R                   | T               | 99.70%                                  | 42.4                  | 25                         | 0                               | 1                                | 0                                | 2                                | 1581.7644                   | 2628                              | 2641                |                    |
| Collagen alpha-1(XI) chain | O98715     | 333145.3        | 100.00%                            | 29                        | 31                       | 33                      | 0.33%                       | 12.20%                       | GISGAIGAPGPR                       | R                   | G               | 99.70%                                  | 43.2                  | 25                         | 0                               | 1                                | 0                                | 2                                | 1076.8606                   | 2788                              | 2779                |                    |
| Collagen alpha-1(XI) chain | O98715     | 333145.3        | 100.00%                            | 29                        | 31                       | 33                      | 0.33%                       | 12.20%                       | IEQLALAK                           | R                   | K               | 99.70%                                  | 44.9                  | 25.9                       | 0                               | 1                                | 0                                | 2                                | 1014.5831                   | 620                               | 628                 |                    |
| Collagen alpha-1(XI) chain | O98715     | 333145.3        | 100.00%                            | 29                        | 31                       | 33                      | 0.33%                       | 12.20%                       | ITGVISEGFR                         | K                   | G               | 99.70%                                  | 59.6                  | 26.3                       | 0                               | 1                                | 0                                | 2                                | 1138.5739                   | 1663                              | 1672                |                    |
| Collagen alpha-1(XI) chain | O98715     | 333145.3        | 100.00%                            | 29                        | 31                       | 33                      | 0.33%                       | 12.20%                       | ITYQSPISGEQGTITIGGR                | R                   | G               | 99.70%                                  | 34.3                  | 25                         | 0                               | 1                                | 0                                | 2                                | 211.0050                    | 1785                              | 1804                |                    |
| Collagen alpha-1(XI) chain | O98715     | 333145.3        | 100.00%                            | 29                        | 31                       | 33                      | 0.33%                       | 12.20%                       | IVNEVDGPR                          | R                   | Q               | 99.70%                                  | 50                    | 26                         | 0                               | 1                                | 0                                | 2                                | 1116.801                    | 1225                              | 1234                |                    |
| Collagen alpha-1(XI) chain | O98715     | 333145.3        | 100.00%                            | 29                        | 31                       | 33                      | 0.33%                       | 12.20%                       | IVDYCEIIEK                         | K                   | D               | 99.70%                                  | 48.4                  | 25.6                       | 0                               | 1                                | 0                                | 2                                | 1458.7187                   | 2662                              | 2672                |                    |
| Collagen alpha-1(XI) chain | O98715     | 333145.3        | 100.00%                            | 29                        | 31                       | 33                      | 0.33%                       | 12.20%                       | LGELVGPDPNTVLEELR                  | R                   | A               | 99.70%                                  | 51.9                  | 25                         | 0                               | 1                                | 0                                | 2                                | 215.1334                    | 1130                              | 1148                |                    |
| Collagen alpha-1(XI) chain | O98715     | 333145.3        | 100.00%                            | 29                        | 31                       | 33                      | 0.33%                       | 12.20%                       | LIPTFSPDIAWQVQTR                   | R                   | D               | 99.70%                                  | 36.5                  | 25                         | 0                               | 1                                | 0                                | 2                                | 2089.011                    | 2601                              | 2611                |                    |
| Collagen alpha-1(XI) chain | O98715     | 333145.3        | 100.00%                            | 29                        | 31                       | 33                      | 0.33%                       | 12.20%                       | LWNPPSPSPVTVK                      | K                   | V               | 99.70%                                  | 47.9                  | 25.9                       | 0                               | 1                                | 0                                | 2                                | 1559.7853                   | 352                               | 365                 |                    |
| Collagen alpha-1(XI) chain | O98715     | 333145.3        | 100.00%                            | 29                        | 31                       | 33                      | 0.33%                       | 12.20%                       | LQPTDTYDTLVPRK                     | R                   | M               | 99.70%                                  | 45.2                  | 25                         | 0                               | 1                                | 0                                | 2                                | 1893.0371                   | 1055                              | 1070                |                    |
| Collagen alpha-1(XI) chain | O98715     | 333145.3        | 100.00%                            | 29                        | 31                       | 33                      | 0.33%                       | 12.20%                       | LNNLQR GQVPTPK                     | R                   | K               | 99.70%                                  | 43.7                  | 25.9                       | 0                               | 1                                | 0                                | 2                                | 1739.9329                   | 2078                              | 2092                |                    |
| Collagen alpha-1(XI) chain | O98715     | 333145.3        | 100.00%                            | 29                        | 31                       | 33                      | 0.33%                       | 12.20%                       | NQRPKPPGPGPSAGAR                   | R                   | G               | 99.70%                                  | 41.2                  | 25.2                       | 0                               | 2                                | 0                                | 2                                | 1610.8037                   | 2939                              | 2956                |                    |
| Collagen alpha-1(XI) chain | O98715     | 333145.3        | 100.00%                            | 29                        | 31                       | 33                      | 0.33%                       | 12.20%                       | SLLOQANLVPRK                       | K                   | G               | 99.70%                                  | 64.3                  | 25                         | 0                               | 1                                | 0                                | 2                                | 1316.7573                   | 1281                              | 1272                |                    |
| Collagen alpha-1(XI) chain | O98715     | 333145.3        | 100.00%                            | 29                        | 31                       | 33                      | 0.33%                       | 12.20%                       | SLYVDYDTQK                         | K                   | N               | 99.70%                                  | 45.9                  | 25                         | 0                               | 1                                | 0                                | 2                                | 1241.5534                   | 941                               | 951                 |                    |
| Collagen alpha-1(XI) chain | O98715     | 333145.3        | 100.00%                            | 29                        | 31                       | 33                      | 0.33%                       | 12.20%                       | SQDEVEIAPR                         | K                   | E               | 99.70%                                  | 49.8                  | 25                         | 0                               | 1                                | 0                                | 2                                | 1143.5641                   | 253                               | 262                 |                    |
| Collagen alpha-1(XI) chain | O98715     | 333145.3        | 100.00%                            | 29                        | 31                       | 33                      | 0.33%                       | 12.20%                       | TEFLNQQYGR                         | R                   | G               | 99.70%                                  | 67.2                  | 25                         | 0                               | 1                                | 0                                | 2                                | 1475.6913                   | 190                               | 200                 |                    |
| Collagen alpha-1(XI) chain | O98715     | 333145.3        | 100.00%                            | 29                        | 31                       | 33                      | 0.33%                       | 12.20%                       | TLENLRDTK                          | R                   | V               | 99.40%                                  | 23.4                  | 26.6                       | 0                               | 1                                | 0                                | 2                                | 1143.6256                   | 778                               | 787                 |                    |
| Collagen alpha-1(XI) chain | O98715     | 333145.3        | 100.00%                            | 29                        | 31                       | 33                      | 0.33%                       | 12.20%                       | TLSIFENK                           | K                   | D               | 94.90%                                  | 20.9                  | 25                         | 0                               | 1                                | 0                                | 2                                | 856.4563                    | 2618                              | 2624                |                    |
| Collagen alpha-1(XI) chain | O98715     | 333145.3        | 100.00%                            | 29                        | 31                       | 33                      | 0.33%                       | 12.20%                       | VAIIDTQK                           | K                   | S               | 99.70%                                  | 46.3                  | 25                         | 0                               | 1                                | 0                                | 2                                | 929.5668                    | 244                               | 252                 |                    |
| Collagen alpha-1(XI) chain | O98715     | 333145.3        | 100.00%                            | 29                        | 31                       | 33                      | 0.33%                       | 12.20%                       | VEDIEAGFPFPR                       | K                   | G               | 99.70%                                  | 66.2                  | 25.4                       | 0                               | 1                                | 0                                | 2                                | 1679.8640                   | 500                               | 513                 |                    |
| Collagen alpha-1(XI) chain | O98715     | 333145.3        | 100.00%                            | 29                        | 31                       | 33                      | 0.33%                       | 12.20%                       | VPPTVTSTVLK                        | K                   | R               | 95.10%                                  | 20.9                  | 25                         | 0                               | 1                                | 0                                | 2                                | 1141.6828                   | 1043                              | 1053                |                    |
| Collagen alpha-1(XI) chain | O98715     | 333145.3        | 100.00%                            | 29                        | 31                       | 33                      | 0.33%                       | 12.20%                       | VSWDPSPSPVLGK                      | R                   | G               | 99.70%                                  | 38.4                  | 26.1                       | 0                               | 1                                | 0                                | 2                                | 1531.7792                   | 2134                              | 2147                |                    |
| Collagen alpha-1(XI) chain | O98715     | 333145.3        | 100.00%                            | 29                        | 31                       | 33                      | 0.33%                       | 12.20%                       | VYVSPDQDTRPSSEWPGMTR               | R                   | M               | 99.70%                                  | 25                    | 26.3                       | 0                               | 1                                | 0                                | 2                                | 2329.2147                   | 1987                              | 1996                |                    |
| Collagen alpha-1(XI) chain | O98715     | 333145.3        | 100.00%                            | 29                        | 31                       | 33                      | 0.33%                       | 12.20%                       | YQDPTSTLNNR                        | R                   | W               | 99.70%                                  | 65.3                  | 25.6                       | 0                               | 1                                | 0                                | 2                                | 1351.6852                   | 1852                              | 1863                |                    |
| Collagen alpha-2(I) chain  | P08123     | 129314.7        | 100.00%                            | 31                        | 36                       | 56                      | 0.56%                       | 39.70%                       | AVILQSGDNVELVAEGNSR                | K                   | F               | 99.70%                                  | 62.6                  | 25.4                       | 0                               | 3                                | 5                                | 0                                | 2                           | 1971.0142                         | 1289                | 1307               |
| Collagen alpha-2(I) chain  | P08123     | 129314.7        | 100.00%                            | 31                        | 36                       | 56                      | 0.56%                       | 39.70%                       | EDPVLPGDGRPPGPPAGAR                | R                   | G               | 99.70%                                  | 30                    | 26.0                       | 0                               | 1                                | 0                                | 2                                | 2040.0890                   | 496                               | 514                 |                    |
| Collagen alpha-2(I) chain  | P08123     | 129314.7        | 100.00%                            | 31                        | 36                       | 56                      | 0.56%                       | 39.70%                       | FTYTLVDGCSK                        | R                   | K               | 99.70%                                  | 81.8                  | 25.6                       | 0                               | 1                                | 0                                | 2                                | 1389.6720                   | 1308                              | 1319                |                    |
| Collagen alpha-2(I) chain  | P08123     | 129314.7        | 100.00%                            | 31                        | 36                       | 56                      | 0.56%                       | 39.70%                       | GAGKAPGVAGAPLQPPR                  | R                   | G               | 99.70%                                  | 38.3                  | 25                         | 0                               | 4                                | 1                                | 0                                | 2                           | 1514.8441                         | 310                 | 327                |
| Collagen alpha-2(I) chain  | P08123     | 129314.7        | 100.00%                            | 31                        | 36                       | 56                      | 0.56%                       | 39.70%                       | GAPKAGAPGATGDRGEAGGAPGAPGPR        | R                   | G               | 99.70%                                  | 23.7                  | 25                         | 0                               | 3                                | 0                                | 2                                | 2689.3300                   | 498                               | 508                 |                    |
| Collagen alpha-2(I) chain  | P08123     | 129314.7        | 100.00%                            | 31                        | 36                       | 56                      | 0.56%                       | 39.70%                       | GDGAPGPGATGPAGPR                   | R                   | T               | 99.70%                                  | 51.9                  | 25                         | 0                               | 1                                | 0                                | 2                                | 1517.6806                   | 778                               | 794                 |                    |
| Collagen alpha-2(I) chain  | P08123     | 129314.7        | 100.00%                            | 31                        | 36                       | 56                      | 0.56%                       | 39.70%                       | GEIGAGVAGNAPGAPGPR                 | K                   | G               | 99.70%                                  | 90.6                  | 25.9                       | 0                               | 2                                | 0                                | 2                                | 1547.7327                   | 265                               | 282                 |                    |
| Collagen alpha-2(I) chain  | P08123     | 129314.7        | 100.00%                            | 31                        | 36                       | 56                      | 0.56%                       | 39.70%                       | GEIGNRDTK                          | R                   | G               | 99.70%                                  | 39                    | 26                         | 0                               | 2                                | 0                                | 2                                | 799.4058                    | 484                               | 491                 |                    |
| Collagen alpha-2(I) chain  | P08123     | 129314.7        | 100.00%                            | 31                        | 36                       | 56                      | 0.56%                       | 39.70%                       | GEFNGKGFQPK                        | R                   | G               | 99.70%                                  | 48.7                  | 25.4                       | 0                               | 2                                | 0                                | 2                                | 1169.5952                   | 687                               | 698                 |                    |
| Collagen alpha-2(I) chain  | P08123     | 129314.7        | 100.00%                            | 31                        | 36                       | 56                      | 0.56%                       | 39.70%                       | GETPSPGVAGTAPGSPSOLPQER            | K                   | G               | 99.70%                                  | 63.1                  | 25                         | 0                               | 1                                | 0                                | 2                                | 2106.0625                   | 622                               | 645                 |                    |
| Collagen alpha-2(I) chain  | P08123     | 129314.7        | 100.00%                            | 31                        | 36                       | 56                      | 0.56%                       | 39.70%                       | GETPSPGVAGTAPGSPSOLPQER            | R                   | G               | 99.70%                                  | 26                    | 25                         | 0                               | 2                                | 0                                | 2                                | 1562.7824                   | 459                               | 471                 |                    |
| Collagen alpha-2(I) chain  | P08123     | 129314.7        | 100.00%                            | 31                        | 36                       | 56                      | 0.56%                       | 39.70%                       | GFPTGTQLRGFK                       | R                   | G               | 99.70%                                  | 31.7                  | 26.5                       | 0                               | 2                                | 0                                | 2                                | 1174.6258                   | 166                               | 177                 |                    |
| Collagen alpha-2(I) chain  | P08123     | 129314.7        | 100.00%                            | 31                        | 36                       | 56                      | 0.56%                       | 39.70%                       | GLHGEFLPGKAPGR                     | R                   | G               | 99.90%                                  | 21.3                  | 26.1                       | 0                               | 0                                | 1                                | 2                                | 1461.7600                   | 574                               | 588                 |                    |
| Collagen alpha-2(I) chain  | P08123     | 129314.7        | 100.00%                            | 31                        | 36                       | 56                      | 0.56%                       | 39.70%                       | GLPSPKQNGAK                        | R                   | G               | 99.70%                                  | 25                    | 22                         | 0                               | 2                                | 0                                | 2                                | 1221.6586                   | 474                               | 483                 |                    |
| Collagen alpha-2(I) chain  | P08123     | 129314.7        | 100.00%                            | 31                        | 36                       | 56                      | 0.56%                       | 39.70%                       | GLPVGAGVGEPPGLGAPGAR               | R                   | G               | 99.70%                                  | 101                   | 25                         | 0                               | 4                                | 0                                | 2                                | 2067.1350                   | 883                               | 906                 |                    |
| Collagen alpha-2(I) chain  | P08123     | 129314.7        | 100.00%                            | 31                        | 36                       | 56                      | 0.56%                       | 39.70%                       | GPKEAGSAGPFGPPDLR                  | R                   | G               | 99.70%                                  | 35.6                  | 25.9                       | 0                               | 1                                | 0                                | 2                                | 1587.7877                   | 382                               | 399                 |                    |
| Collagen alpha-2(I) chain  | P08123     | 129314.7        | 100.00%                            | 31                        | 36                       | 56                      | 0.56%                       | 39.70%                       | GPPIAGAGAPDTPQFQPMGEPEGEQGTAPGAPAR | R                   | M               | 99.70%                                  | 39.245                | 25                         | 0                               | 1                                | 0                                | 2                                | 2826.3175                   | 132                               | 140                 |                    |
| Collagen alpha-2(I) chain  | P08123     | 129314.7        | 100.00%                            | 31                        | 36                       | 56                      | 0.56%                       | 39.70%                       | GPPIAGSVPGVNGVAGEAGR               | R                   | D               | 99.70%                                  | 89                    | 25.2                       | 0                               | 1                                | 0                                | 2                                | 1703.8462                   | 907                               | 926                 |                    |
| Collagen alpha-2(I) chain  | P08123     | 129314.7        | 100.00%                            | 31                        | 36                       | 56                      | 0.56%                       | 39.70%                       | GPPIQESGAGATFGPQSR                 | R                   | G               | 99.70%                                  | 67.2                  | 25.4                       | 0                               | 1                                | 0                                | 2                                | 1564.7717                   | 592                               | 609                 |                    |
| Collagen alpha-2(I) chain  | P08123     | 129314.7        | 100.00%                            | 31                        | 36                       | 56                      | 0.56%                       | 39.70%                       | GPSPGPPGKNGKEPDDVGVAGTAPGSPSOLPQER | R                   | G               | 99.70%                                  | 28.3                  | 25                         | 0                               | 2                                | 0                                | 2                                | 316.5566                    | 645                               | 655                 |                    |
| Collagen alpha-2(I) chain  | P08123     | 129314.7        | 100.00%                            | 31                        | 36                       | 56                      | 0.56%                       | 39.70%                       | QDSGSVGVPGVAGPISGAPPPGAPGPK        | R                   | G               | 99.70%                                  | 94.1                  | 25                         | 0                               | 2                                | 1                                | 2                                | 2541.2738                   | 235                               | 264                 |                    |
| Collagen alpha-2(I) chain  | P08123     | 129314.7        | 100.00%                            | 31                        | 36                       | 56                      | 0.56%                       | 39.70%                       | QVGLGPGMGLMPPR                     | R                   | G               | 99.70%                                  | 34.8                  | 25.6                       | 0                               | 1                                | 0                                | 2                                | 1427.7138                   | 85                                | 99                  |                    |
| Collagen alpha-2(I) chain  | P08123     | 129314.7        | 100.00%                            | 31                        | 36                       | 56                      | 0.56%                       | 39.70%                       | QVVGQDAR                           | R                   | G               | 99.70%                                  | 30                    | 26                         | 0                               | 2                                | 0                                | 2                                | 849.4687                    | 948                               | 958                 |                    |
| Collagen alpha-2(I) chain  | P08123     | 129314.7        | 100.00%                            | 31                        | 36                       | 56                      | 0.56%                       | 39.70%                       | QYKNGKGPVAGAGAPPHGPVPVQAK          | R                   | H               | 99.60%                                  | 24.9                  | 25                         | 0                               | 2                                | 0                                | 2                                | 2252.1575                   | 949                               | 974                 |                    |
| Collagen alpha-2(I) chain  | P08123     | 129314.7        | 100.00%                            | 31                        | 36                       | 56                      | 0.56%                       | 39.70%                       | HMRGTEGPSPGVAGAGVPR                | K                   | G               | 99.70%                                  | 24.4                  | 25                         | 0                               | 0                                | 1                                | 2                                | 2027.0168                   | 975                               | 996                 |                    |
| Collagen alpha-2(I) chain  | P08123     | 129314.7        | 100.00%                            | 31                        | 36                       | 56                      | 0.56%                       | 39.70%                       | ISNVAIDETQNLK                      | R                   | G               | 99.70%                                  | 25.8                  | 25                         | 0                               | 2                                | 0                                | 2                                | 1728.8111                   | 1204                              | 1216                |                    |
| Collagen alpha-2(I) chain  | P08123     | 129314.7        | 100.00%                            | 31                        | 36                       | 56                      | 0.56%                       | 39.70%                       | SLNNQIETLTPEGR                     | K                   | K               | 99.70%                                  | 32.2                  | 25.4                       | 0                               | 1                                | 0                                | 2                                | 1771.9186                   | 1141                              | 1156                |                    |
| Collagen alpha-2(I) chain  | P08123     | 129314.7        | 100.00%                            | 31                        | 36                       | 56                      | 0.56%                       | 39.70%                       | TGEVLAGPPQAGEK                     | R                   | G               | 99.70%                                  | 42.7                  | 25                         | 0                               | 1                                | 0                                | 2                                | 1472.7382                   | 831                               | 846                 |                    |
| Collagen alpha-2(I) chain  | P08123     | 129314.7        | 100.00%                            | 31                        | 36                       | 56                      | 0.56%                       | 39.70%                       | TGPSPGPPGPPGPPGAPGAK               | R                   | D               | 99.70%                                  | 82.3                  | 25.7                       | 0                               | 2                                | 0                                | 2                                | 1781.9186                   | 735                               | 745                 |                    |
| Collagen alpha-2(I) chain  | P08123     | 129314.7        | 100.00%                            | 31                        | 36                       | 56                      | 0.56%                       | 39.70%                       | VGAPGAPGAR                         | R                   | G               | 99.70%                                  | 30.5                  | 25                         | 0                               | 2                                | 0                                | 2                                | 852.4687                    | 225                               | 234                 |                    |
| Collagen alpha-2(I) chain  | P08123     | 129314.7        | 100.00%                            | 31                        | 36                       | 56                      | 0.56%                       | 39.70%                       | VYDFDFTGETQTR                      | K                   | A               | 99.70%                                  | 64                    | 25                         | 0                               | 1                                | 0                                | 2                                | 1607.8830                   | 1193                              | 1205                |                    |
| Collagen alpha-2(IV) chain | P08572     | 167557.6        | 100.00%                            | 7                         | 7                        | 8                       | 0.07%                       | 5.55%                        | EGFPGLGPPGPR                       | R                   | G               | 99.70%                                  | 31.7                  | 25.1                       | 0                               | 1                                | 0                                | 2                                | 1158.6220                   | 471                               | 480                 |                    |
| Collagen alpha-2(IV) chain | P08572     | 167557.6        | 100.00%                            | 7                         | 7                        | 8                       | 0.07%                       | 5.55%                        | EGFPGLGPPGPR                       | R                   | G               | 99.70%                                  | 30                    | 25.4                       | 0                               | 1                                | 0                                | 2                                | 1327.6796                   | 728                               | 740                 |                    |
| Collagen alpha-2(IV) chain | P08572     | 167557.6        | 100.00%                            | 7                         | 7                        | 8                       | 0.07%                       | 5.55%                        | GDGQPGKALPGFPLR                    | K                   | G               | 99.70%                                  | 34.1                  | 25.2                       | 0                               | 1                                | 0                                | 2                                | 1766.8681                   | 1176                              | 1193                |                    |
| Collagen alpha-2(IV) chain | P08572     | 167557.6        | 100.00%                            | 7                         | 7                        | 8                       |                             |                              |                                    |                     |                 |                                         |                       |                            |                                 |                                  |                                  |                                  |                             |                                   |                     |                    |

| Protein name                                 | Protein AC | Protein Mw (Da) | Protein identification probability | Number of unique peptides | Number of unique spectra | Number of total spectra | Percentage of total spectra | Percentage sequence coverage | Peptide sequence        | Previous amino acid | Next amino acid | Best Peptide Identification probability | Best Mascot Ion score | Best Mascot Identity score | Number of identified +H spectra | Number of identified +2H spectra | Number of identified +3H spectra | Number of identified +4H spectra | Number of enzymatic termini | Calculated +H Peptide Mass (AMU) | Peptide start index | Peptide stop index |
|----------------------------------------------|------------|-----------------|------------------------------------|---------------------------|--------------------------|-------------------------|-----------------------------|------------------------------|-------------------------|---------------------|-----------------|-----------------------------------------|-----------------------|----------------------------|---------------------------------|----------------------------------|----------------------------------|----------------------------------|-----------------------------|----------------------------------|---------------------|--------------------|
| Fibronectin                                  | P02751     | 262616.9        | 100.00%                            | 47                        | 65                       | 87                      | 0.73%                       | 28.60%                       | GLAFVTQVDSDIK           | K                   | I               | 99.70%                                  | 82.1                  | 26.3                       | 0                               | 1                                | 0                                | 0                                | 2                           | 1379.7055                        | 1637                | 1649               |
| Fibronectin                                  | P02751     | 262616.9        | 100.00%                            | 47                        | 65                       | 87                      | 0.73%                       | 28.60%                       | GNLLOCTGMR              | R                   | Q               | 99.70%                                  | 85.3                  | 25                         | 0                               | 2                                | 0                                | 0                                | 2                           | 1462.8892                        | 263                 | 295                |
| Fibronectin                                  | P02751     | 262616.9        | 100.00%                            | 47                        | 65                       | 87                      | 0.73%                       | 28.60%                       | HTSVQTTSSGSGFTDVR       | R                   | A               | 99.70%                                  | 86.4                  | 25                         | 0                               | 2                                | 0                                | 0                                | 2                           | 1863.8832                        | 1273                | 1280               |
| Fibronectin                                  | P02751     | 262616.9        | 100.00%                            | 47                        | 65                       | 87                      | 0.73%                       | 28.60%                       | HYNQWQWR                | K                   | T               | 99.70%                                  | 38.5                  | 25                         | 0                               | 4                                | 1                                | 0                                | 2                           | 1401.6658                        | 58                  | 67                 |
| Fibronectin                                  | P02751     | 262616.9        | 100.00%                            | 47                        | 65                       | 87                      | 0.73%                       | 28.60%                       | IAWESRGQGVSR            | R                   | Y               | 99.70%                                  | 52.4                  | 25.7                       | 0                               | 4                                | 0                                | 0                                | 2                           | 1357.6859                        | 1661                | 1661               |
| Fibronectin                                  | P02751     | 262616.9        | 100.00%                            | 47                        | 65                       | 87                      | 0.73%                       | 28.60%                       | ISCTIANR                | R                   | C               | 99.70%                                  | 53.8                  | 26.9                       | 0                               | 0                                | 0                                | 2                                | 934.4775                    | 133                              | 140                 |                    |
| Fibronectin                                  | P02751     | 262616.9        | 100.00%                            | 47                        | 65                       | 87                      | 0.73%                       | 28.60%                       | ITGVYIK                 | R                   | Y               | 99.60%                                  | 28                    | 25                         | 0                               | 1                                | 0                                | 0                                | 2                           | 807.4978                         | 1930                | 1936               |
| Fibronectin                                  | P02751     | 262616.9        | 100.00%                            | 47                        | 65                       | 87                      | 0.73%                       | 28.60%                       | ITYGETGMSNPQFETVPSGK    | R                   | Y               | 99.70%                                  | 38.5                  | 25                         | 0                               | 1                                | 0                                | 0                                | 2                           | 2148.9598                        | 1500                | 1500               |
| Fibronectin                                  | P02751     | 262616.9        | 100.00%                            | 47                        | 65                       | 87                      | 0.73%                       | 28.60%                       | LVKRPSSQSGEAPR          | K                   | E               | 99.70%                                  | 53.3                  | 25                         | 0                               | 1                                | 2                                | 0                                | 2                           | 1323.7129                        | 1117                | 1129               |
| Fibronectin                                  | P02751     | 262616.9        | 100.00%                            | 47                        | 65                       | 87                      | 0.73%                       | 28.60%                       | LLCCQLGFGSGHFR          | K                   | Q               | 99.70%                                  | 44.8                  | 25                         | 0                               | 1                                | 1                                | 0                                | 2                           | 1651.7834                        | 2231                | 2244               |
| Fibronectin                                  | P02751     | 262616.9        | 100.00%                            | 47                        | 65                       | 87                      | 0.73%                       | 28.60%                       | NLDPASEYGLVLAIVAK       | R                   | Y               | 99.70%                                  | 52.3                  | 25                         | 0                               | 1                                | 0                                | 0                                | 2                           | 1732.9480                        | 1033                | 1070               |
| Fibronectin                                  | P02751     | 262616.9        | 100.00%                            | 47                        | 65                       | 87                      | 0.73%                       | 28.60%                       | NITFAEVLGLSPGVITYYFK    | R                   | V               | 99.70%                                  | 66.7                  | 25                         | 0                               | 0                                | 0                                | 2                                | 1993.9066                   | 959                              | 976                 |                    |
| Fibronectin                                  | P02751     | 262616.9        | 100.00%                            | 47                        | 65                       | 87                      | 0.73%                       | 28.60%                       | QDQHLWCSTISNYEGDQK      | R                   | Y               | 99.70%                                  | 48                    | 25                         | 0                               | 1                                | 2                                | 0                                | 2                           | 2196.9253                        | 380                 | 397                |
| Fibronectin                                  | P02751     | 262616.9        | 100.00%                            | 47                        | 65                       | 87                      | 0.73%                       | 28.60%                       | QYVNGVSVYR              | R                   | Y               | 99.70%                                  | 32.4                  | 26.7                       | 0                               | 1                                | 0                                | 0                                | 2                           | 1078.5827                        | 1041                | 1050               |
| Fibronectin                                  | P02751     | 262616.9        | 100.00%                            | 47                        | 65                       | 87                      | 0.73%                       | 28.60%                       | QYVNGVSKYPLR            | R                   | N               | 99.70%                                  | 40.2                  | 25                         | 0                               | 0                                | 1                                | 0                                | 2                           | 1607.8540                        | 1041                | 1054               |
| Fibronectin                                  | P02751     | 262616.9        | 100.00%                            | 47                        | 65                       | 87                      | 0.73%                       | 28.60%                       | RKPGEPSPETGTQGSVNYQSQR  | R                   | Y               | 99.70%                                  | 55.3                  | 25                         | 0                               | 1                                | 2                                | 0                                | 2                           | 2396.0863                        | 2335                | 2356               |
| Fibronectin                                  | P02751     | 262616.9        | 100.00%                            | 47                        | 65                       | 87                      | 0.73%                       | 28.60%                       | SSPVDIASITADAPNSLR      | R                   | Q               | 99.70%                                  | 75.7                  | 25                         | 0                               | 1                                | 1                                | 0                                | 2                           | 1912.9875                        | 1892                | 1910               |
| Fibronectin                                  | P02751     | 262616.9        | 100.00%                            | 47                        | 65                       | 87                      | 0.73%                       | 28.60%                       | STTPDITGVR              | R                   | I               | 99.70%                                  | 37.2                  | 25                         | 0                               | 2                                | 0                                | 0                                | 2                           | 1110.5427                        | 1198                | 1207               |
| Fibronectin                                  | P02751     | 262616.9        | 100.00%                            | 47                        | 65                       | 87                      | 0.73%                       | 28.60%                       | SYTITGLQPDITDKY         | R                   | Y               | 99.70%                                  | 70.3                  | 25                         | 0                               | 1                                | 2                                | 0                                | 2                           | 2543.7641                        | 1867                | 1880               |
| Fibronectin                                  | P02751     | 262616.9        | 100.00%                            | 47                        | 65                       | 87                      | 0.73%                       | 28.60%                       | TELPKPSOMVTDVNDMSISYK   | R                   | Q               | 99.70%                                  | 36.1                  | 25                         | 0                               | 0                                | 1                                | 0                                | 2                           | 2478.3032                        | 1540                | 1561               |
| Fibronectin                                  | P02751     | 262616.9        | 100.00%                            | 47                        | 65                       | 87                      | 0.73%                       | 28.60%                       | TETITGFQVDAVPANGOTPIR   | K                   | T               | 99.70%                                  | 31.6                  | 25                         | 0                               | 0                                | 0                                | 2                                | 2343.1942                   | 1838                             | 1859                |                    |
| Fibronectin                                  | P02751     | 262616.9        | 100.00%                            | 47                        | 65                       | 87                      | 0.73%                       | 28.60%                       | TKETITGFQVDAVPANGOTPIOR | T                   | T               | 99.70%                                  | 25.4                  | 25                         | 0                               | 0                                | 0                                | 2                                | 2572.3369                   | 1836                             | 1859                |                    |
| Fibronectin                                  | P02751     | 262616.9        | 100.00%                            | 47                        | 65                       | 87                      | 0.73%                       | 28.60%                       | TYLGNALVCTVGGSSR        | R                   | Q               | 99.70%                                  | 68.8                  | 25                         | 0                               | 1                                | 1                                | 0                                | 2                           | 1731.8154                        | 68                  | 83                 |
| Fibronectin                                  | P02751     | 262616.9        | 100.00%                            | 47                        | 65                       | 87                      | 0.73%                       | 28.60%                       | VDVPLNALKEQGR           | R                   | L               | 99.70%                                  | 38.1                  | 25                         | 0                               | 1                                | 0                                | 2                                | 1629.8709                   | 939                              | 953                 |                    |
| Fibronectin                                  | P02751     | 262616.9        | 100.00%                            | 47                        | 65                       | 87                      | 0.73%                       | 28.60%                       | VDGYTERPK               | R                   | D               | 99.70%                                  | 31.2                  | 26.5                       | 0                               | 1                                | 0                                | 2                                | 1064.5372                   | 108                              | 116                 |                    |
| Fibronectin                                  | P02751     | 262616.9        | 100.00%                            | 47                        | 65                       | 87                      | 0.73%                       | 28.60%                       | VPIQTSSATITQLTR         | R                   | Y               | 99.70%                                  | 25                    | 25                         | 0                               | 0                                | 0                                | 2                                | 1461.7209                   | 2197                             | 2164                |                    |
| Fibronectin                                  | P02751     | 262616.9        | 100.00%                            | 47                        | 65                       | 87                      | 0.73%                       | 28.60%                       | VITMIVTPPESAVTGVR       | K                   | V               | 99.70%                                  | 33.1                  | 25.1                       | 0                               | 2                                | 0                                | 2                                | 1823.8998                   | 923                              | 938                 |                    |
| Fibronectin                                  | P02751     | 262616.9        | 100.00%                            | 47                        | 65                       | 87                      | 0.73%                       | 28.60%                       | VIVAPPSPDILTNFLVR       | R                   | Y               | 99.70%                                  | 68.1                  | 25                         | 0                               | 2                                | 0                                | 2                                | 1926.0485                   | 1285                             | 1301                |                    |
| Fibronectin                                  | P02751     | 262616.9        | 100.00%                            | 47                        | 65                       | 87                      | 0.73%                       | 28.60%                       | WLRFSSPVYR              | R                   | Y               | 99.70%                                  | 26.2                  | 25                         | 0                               | 0                                | 0                                | 2                                | 1346.6848                   | 1592                             | 1573                |                    |
| Fibronectin                                  | P02751     | 262616.9        | 100.00%                            | 47                        | 65                       | 87                      | 0.73%                       | 28.60%                       | WSRSPARTIGYR            | R                   | I               | 99.70%                                  | 32.5                  | 26.3                       | 0                               | 1                                | 0                                | 2                                | 1431.7492                   | 831                              | 842                 |                    |
| Fibronectin                                  | P02751     | 262616.9        | 100.00%                            | 47                        | 65                       | 87                      | 0.73%                       | 28.60%                       | YEVSVYALK               | K                   | D               | 99.60%                                  | 28.8                  | 25.8                       | 0                               | 1                                | 0                                | 2                                | 1071.5720                   | 1788                             | 1796                |                    |
| Fibronectin                                  | P02751     | 262616.9        | 100.00%                            | 47                        | 65                       | 87                      | 0.73%                       | 28.60%                       | YSPFTDHTVLQVTR          | R                   | Y               | 99.70%                                  | 48.3                  | 25                         | 0                               | 1                                | 0                                | 2                                | 1728.8218                   | 611                              | 619                 |                    |
| Fibulin-1                                    | P23142     | 77211.6         | 100.00%                            | 3                         | 4                        | 4                       | 0.03%                       | 2.84%                        | DSFDIK                  | R                   | R               | 99.70%                                  | 4.2                   | 25.8                       | 0                               | 1                                | 0                                | 0                                | 2                           | 837.4354                         | 643                 | 649                |
| Fibulin-1                                    | P23142     | 77211.6         | 100.00%                            | 3                         | 4                        | 4                       | 0.03%                       | 2.84%                        | DSFDIKR                 | R                   | Y               | 99.70%                                  | 40.1                  | 25.7                       | 0                               | 1                                | 0                                | 0                                | 2                           | 993.5365                         | 643                 | 650                |
| Fibulin-1                                    | P23142     | 77211.6         | 100.00%                            | 3                         | 4                        | 4                       | 0.03%                       | 2.84%                        | EFFTRIEEILR             | R                   | Y               | 99.70%                                  | 34                    | 25.7                       | 0                               | 1                                | 0                                | 0                                | 2                           | 1540.8374                        | 619                 | 608                |
| Flamm-A                                      | P21333     | 280729.4        | 100.00%                            | 3                         | 3                        | 3                       | 0.03%                       | 1.74%                        | IANLQDTLSQGLR           | R                   | L               | 99.70%                                  | 62.6                  | 25.1                       | 0                               | 1                                | 0                                | 0                                | 2                           | 1415.7491                        | 64                  | 76                 |
| Flamm-A                                      | P21333     | 280729.4        | 100.00%                            | 3                         | 3                        | 3                       | 0.03%                       | 1.74%                        | TGVANNKPAEFTVDAK        | K                   | H               | 99.50%                                  | 22                    | 25                         | 0                               | 0                                | 0                                | 2                                | 1646.8749                   | 685                              | 700                 |                    |
| Flamm-A                                      | P21333     | 280729.4        | 100.00%                            | 3                         | 3                        | 3                       | 0.03%                       | 1.74%                        | VTAAQGLGERSGNANK        | R                   | C               | 99.70%                                  | 22.8                  | 25.2                       | 0                               | 0                                | 0                                | 2                                | 1652.8604                   | 404                              | 409                 |                    |
| Follistatin-related protein 1                | Q12841     | 34985.3         | 100.00%                            | 6                         | 6                        | 6                       | 0.05%                       | 20.10%                       | CNLPSPNPPEKK            | K                   | C               | 99.70%                                  | 35.6                  | 25.5                       | 0                               | 1                                | 0                                | 0                                | 2                           | 1430.7098                        | 221                 | 232                |
| Follistatin-related protein 1                | Q12841     | 34985.3         | 100.00%                            | 6                         | 6                        | 6                       | 0.05%                       | 20.10%                       | CNLPVFCGGR              | K                   | E               | 99.70%                                  | 49.2                  | 25                         | 0                               | 1                                | 0                                | 0                                | 2                           | 1224.5513                        | 30                  | 40                 |
| Follistatin-related protein 1                | Q12841     | 34985.3         | 100.00%                            | 6                         | 6                        | 6                       | 0.05%                       | 20.10%                       | LSSEER                  | R                   | D               | 99.70%                                  | 25.2                  | 25                         | 0                               | 0                                | 0                                | 2                                | 938.4830                    | 263                              | 263                 |                    |
| Follistatin-related protein 1                | Q12841     | 34985.3         | 100.00%                            | 6                         | 6                        | 6                       | 0.05%                       | 20.10%                       | LSFOELK                 | K                   | C               | 99.70%                                  | 51.7                  | 25                         | 0                               | 1                                | 0                                | 2                                | 1011.5510                   | 213                              | 220                 |                    |
| Follistatin-related protein 1                | Q12841     | 34985.3         | 100.00%                            | 6                         | 6                        | 6                       | 0.05%                       | 20.10%                       | SVSPSPASVCGYQSNR        | K                   | D               | 99.70%                                  | 62.6                  | 25                         | 0                               | 1                                | 0                                | 2                                | 1737.8223                   | 103                              | 116                 |                    |
| Follistatin-related protein 1                | Q12841     | 34985.3         | 100.00%                            | 6                         | 6                        | 6                       | 0.05%                       | 20.10%                       | YVQELK                  | R                   | D               | 99.70%                                  | 26                    | 25.4                       | 0                               | 0                                | 0                                | 2                                | 907.4894                    | 286                              | 286                 |                    |
| Galectin-1                                   | P09382     | 14715.8         | 100.00%                            | 4                         | 5                        | 5                       | 0.05%                       | 31.90%                       | DSNLNCLFNPNR            | K                   | F               | 99.70%                                  | 43.3                  | 25                         | 0                               | 1                                | 0                                | 2                                | 1486.6856                   | 38                               | 49                  |                    |
| Galectin-1                                   | P09382     | 14715.8         | 100.00%                            | 4                         | 5                        | 5                       | 0.05%                       | 31.90%                       | FNAGHDANTVCSNK          | R                   | D               | 99.70%                                  | 36.5                  | 25                         | 0                               | 1                                | 0                                | 2                                | 1647.7544                   | 50                               | 64                  |                    |
| Galectin-1                                   | P09382     | 14715.8         | 100.00%                            | 4                         | 5                        | 5                       | 0.05%                       | 31.90%                       | LPQVEYK                 | R                   | S               | 99.70%                                  | 21                    | 25                         | 0                               | 0                                | 0                                | 2                                | 965.4725                    | 30                               | 37                  |                    |
| Galectin-1                                   | P09382     | 14715.8         | 100.00%                            | 4                         | 5                        | 5                       | 0.05%                       | 31.90%                       | SFNLNLK                 | K                   | D               | 99.70%                                  | 38.9                  | 25                         | 0                               | 1                                | 0                                | 2                                | 877.5142                    | 30                               | 37                  |                    |
| Glia-derived nexin                           | P07093     | 44003.2         | 100.00%                            | 5                         | 5                        | 5                       | 0.04%                       | 11.10%                       | DIVIVANVFKP             | K                   | N               | 99.70%                                  | 67.3                  | 25                         | 0                               | 1                                | 0                                | 2                                | 1275.7307                   | 106                              | 117                 |                    |
| Glia-derived nexin                           | P07093     | 44003.2         | 100.00%                            | 5                         | 5                        | 5                       | 0.04%                       | 11.10%                       | DVPVQGLR                | R                   | C               | 99.70%                                  | 33.7                  | 25                         | 0                               | 1                                | 0                                | 2                                | 1059.4630                   | 132                              | 132                 |                    |
| Glia-derived nexin                           | P07093     | 44003.2         | 100.00%                            | 5                         | 5                        | 5                       | 0.04%                       | 11.10%                       | FTAVAGDTLK              | K                   | E               | 99.70%                                  | 43.3                  | 25.6                       | 0                               | 0                                | 0                                | 2                                | 1093.5889                   | 296                              | 305                 |                    |
| Glia-derived nexin                           | P07093     | 44003.2         | 100.00%                            | 5                         | 5                        | 5                       | 0.04%                       | 11.10%                       | FTAVAGDTLKEFLK          | K                   | V               | 97.10%                                  | 17.3                  | 25                         | 0                               | 0                                | 1                                | 2                                | 1560.8634                   | 296                              | 309                 |                    |
| Glia-derived nexin                           | P07093     | 44003.2         | 100.00%                            | 5                         | 5                        | 5                       | 0.04%                       | 11.10%                       | LKLVNAVYK               | R                   | Y               | 99.70%                                  | 48.3                  | 25                         | 0                               | 1                                | 0                                | 2                                | 1165.6979                   | 191                              | 81                  |                    |
| Heat shock protein HSP 90-beta               | P08238     | 83267.3         | 100.00%                            | 4                         | 4                        | 4                       | 0.03%                       | 6.22%                        | ADNLNNLGTIAK            | K                   | S               | 99.70%                                  | 60.2                  | 25                         | 0                               | 1                                | 0                                | 2                                | 1242.7054                   | 96                               | 107                 |                    |
| Heat shock protein HSP 90-beta               | P08238     | 83267.3         | 100.00%                            | 4                         | 4                        | 4                       | 0.03%                       | 6.22%                        | ALLPIR                  | R                   | R               | 99.70%                                  | 29.8                  | 25                         | 0                               | 0                                | 0                                | 2                                | 829.5295                    | 331                              | 337                 |                    |
| Heat shock protein HSP 90-beta               | P08238     | 83267.3         | 100.00%                            | 4                         | 4                        | 4                       | 0.03%                       | 6.22%                        | ELUNASADALIK            | R                   | R               | 99.70%                                  | 48                    | 25                         | 0                               | 1                                | 0                                | 2                                | 1275.6428                   | 42                               | 49                  |                    |
| Heat shock protein HSP 90-beta               | P08238     | 83267.3         | 100.00%                            | 4                         | 4                        | 4                       | 0.03%                       | 6.22%                        | GVVDSDELPLNSR           | R                   | E               | 99.70%                                  | 69.4                  | 25.3                       | 0                               | 1                                | 0                                | 2                                | 1513.7858                   | 279                              | 392                 |                    |
| Insulin-like growth factor-binding protein 2 | P18065     | 34813.6         | 100.00%                            | 4                         | 4                        | 4                       | 0.04%                       | 17.50%                       | LAACQPPVAPPAAVAAGGAR    | M                   | R               | 99.70%                                  | 45.3                  | 25                         | 0                               | 0                                | 0                                | 2                                | 2041.1013                   | 50                               | 72                  |                    |
| Insulin-like growth factor-binding protein 2 | P18065     | 34813.6         | 100.00%                            | 4                         | 4                        | 4                       | 0.04%                       | 17.50%                       | LEEGACQVR               | R                   | C               | 99.70%                                  | 52.2                  | 25                         | 0                               | 0                                | 0                                | 2                                | 1351.6312                   | 93                               | 101                 |                    |
| Insulin-like growth factor-binding protein 2 | P18065     | 34813.6         | 100.00%                            | 4                         | 4                        | 4                       | 0.04%                       | 17.50%                       | LQAGAPTR                | K                   | Q               | 99.70%                                  | 29.1                  | 25                         | 0                               | 1                                | 0                                | 2                                | 966.5899                    | 293                              | 301                 |                    |
| Insulin-like growth factor-binding protein 2 | P17936     | 31674.1         | 100.00%                            | 6                         | 7                        | 8                       | 0.08%                       | 27.10%                       | QIQOQDELQVLEIR          | R                   | E               | 99.70%                                  | 102                   | 25                         | 0                               | 1                                | 0                                | 2                                | 1615.7747                   | 225                              | 237                 |                    |
| Insulin-like growth factor-binding protein 2 | P17936     | 31674.1         | 100.00%                            | 6                         | 7                        | 8                       | 0.08%                       | 27.10%                       | ALACQPPVAVQGLR          | R                   | C               | 99.70%                                  | 52.2                  | 25                         | 0                               | 2                                | 0                                | 2                                | 1626.3304                   | 47                               | 63                  |                    |
| Insulin-like growth factor-binding protein 2 | P17936     | 31674.1         | 100.00%                            | 6                         | 7                        | 8                       | 0.08%                       | 27.10%                       | EPQGGQCLTALCEGQPCGIYTER | R                   | C               | 99.70%                                  | 25.5                  | 25                         | 0                               | 1                                | 0                                | 2                                | 2775.1304                   | 64                               | 87                  |                    |
|                                              |            |                 |                                    |                           |                          |                         |                             |                              |                         |                     |                 |                                         |                       |                            |                                 |                                  |                                  |                                  |                             |                                  |                     |                    |

| Protein name                   | Protein AC | Protein Mw (Da) | Protein identification probability | Number of unique peptides | Number of unique spectra | Number of total spectra | Percentage of total spectra | Percentage sequence coverage | Peptide sequence     | Previous amino acid | Next amino acid | Best Peptide identification probability | Best Mascot ion score | Best Mascot identity score | Number of identified +1H spectra | Number of identified +2H spectra | Number of identified +3H spectra | Number of identified +4H spectra | Number of enzymatic termini | Calculated +1H Peptide Mass (AMU) | Peptide start index | Peptide stop index |
|--------------------------------|------------|-----------------|------------------------------------|---------------------------|--------------------------|-------------------------|-----------------------------|------------------------------|----------------------|---------------------|-----------------|-----------------------------------------|-----------------------|----------------------------|----------------------------------|----------------------------------|----------------------------------|----------------------------------|-----------------------------|-----------------------------------|---------------------|--------------------|
| Serpin H1                      | P50454     | 46442.0         | 100.00%                            | 5                         | 5                        | 6                       | 0.06%                       | 14.40%                       | AVLSAEQLR            | K                   | D               | 99.70%                                  | 39.5                  | 26.2                       | 0                                | 1                                | 0                                | 0                                | 2                           | 986.5629                          | 95                  | 103                |
| Serpin H1                      | P50454     | 46442.0         | 100.00%                            | 5                         | 5                        | 6                       | 0.06%                       | 14.40%                       | DEEVHAGLQELLR        | R                   | S               | 99.70%                                  | 54.3                  | 25.3                       | 0                                | 1                                | 0                                | 0                                | 2                           | 1437.7334                         | 104                 | 116                |
| Serpin H1                      | P50454     | 46442.0         | 100.00%                            | 5                         | 5                        | 6                       | 0.06%                       | 14.40%                       | DTQSGSLIFGR          | R                   | L               | 99.70%                                  | 62                    | 25.7                       | 0                                | 2                                | 0                                | 0                                | 2                           | 1293.6799                         | 394                 | 405                |
| Serpin H1                      | P50454     | 46442.0         | 100.00%                            | 5                         | 5                        | 6                       | 0.06%                       | 14.40%                       | GVVEVTHDLQK          | K                   | H               | 99.70%                                  | 37.6                  | 25                         | 0                                | 1                                | 0                                | 0                                | 2                           | 1224.6584                         | 309                 | 319                |
| Serpin H1                      | P50454     | 46442.0         | 100.00%                            | 5                         | 5                        | 6                       | 0.06%                       | 14.40%                       | LYQPSVSVFADQFVR      | R                   | S               | 99.70%                                  | 48.5                  | 25                         | 0                                | 1                                | 0                                | 0                                | 2                           | 1659.8013                         | 134                 | 146                |
| SPARC                          | P09486     | 34631.9         | 100.00%                            | 9                         | 12                       | 14                      | 0.12%                       | 31.70%                       | FFETCDLNDK           | R                   | Y               | 99.70%                                  | 66.3                  | 25                         | 0                                | 2                                | 0                                | 0                                | 2                           | 1403.5786                         | 269                 | 279                |
| SPARC                          | P09486     | 34631.9         | 100.00%                            | 9                         | 12                       | 14                      | 0.12%                       | 31.70%                       | LEAGDHPVELLAR        | R                   | D               | 99.50%                                  | 21.4                  | 25.2                       | 0                                | 0                                | 1                                | 0                                | 2                           | 1415.7592                         | 206                 | 218                |
| SPARC                          | P09486     | 34631.9         | 100.00%                            | 9                         | 12                       | 14                      | 0.12%                       | 31.70%                       | LHLVDGPK             | K                   | Y               | 99.70%                                  | 34.9                  | 26.1                       | 0                                | 1                                | 0                                | 0                                | 2                           | 1215.6193                         | 141                 | 150                |
| SPARC                          | P09486     | 34631.9         | 100.00%                            | 9                         | 12                       | 14                      | 0.12%                       | 31.70%                       | NVLVTLYER            | K                   | D               | 99.70%                                  | 40.4                  | 25                         | 0                                | 0                                | 1                                | 0                                | 2                           | 1106.6204                         | 173                 | 181                |
| SPARC                          | P09486     | 34631.9         | 100.00%                            | 9                         | 12                       | 14                      | 0.12%                       | 31.70%                       | NVLVTLYERDENNALLTEK  | K                   | Q               | 99.70%                                  | 67.2                  | 25                         | 0                                | 1                                | 1                                | 0                                | 2                           | 2278.1563                         | 173                 | 191                |
| SPARC                          | P09486     | 34631.9         | 100.00%                            | 9                         | 12                       | 14                      | 0.12%                       | 31.70%                       | RLEKGRHNVLELRL       | K                   | D               | 99.70%                                  | 22.8                  | 25                         | 0                                | 0                                | 1                                | 0                                | 2                           | 1575.8603                         | 205                 | 218                |
| SPARC                          | P09486     | 34631.9         | 100.00%                            | 9                         | 12                       | 14                      | 0.12%                       | 31.70%                       | TFDSCHFFATK          | K                   | C               | 99.70%                                  | 73.4                  | 25                         | 0                                | 0                                | 1                                | 0                                | 2                           | 1447.6311                         | 118                 | 129                |
| SPARC                          | P09486     | 34631.9         | 100.00%                            | 9                         | 12                       | 14                      | 0.12%                       | 31.70%                       | VALDEWAQDFQIK        | K                   | Q               | 99.70%                                  | 54.4                  | 25                         | 0                                | 1                                | 0                                | 0                                | 2                           | 1642.7936                         | 280                 | 293                |
| SPARC                          | P09486     | 34631.9         | 100.00%                            | 9                         | 12                       | 14                      | 0.12%                       | 31.70%                       | RPTCDLSELTETPLR      | K                   | N               | 99.70%                                  | 40.8                  | 25                         | 0                                | 2                                | 1                                | 0                                | 2                           | 1949.9480                         | 151                 | 166                |
| Testican-1                     | Q08629     | 49124.8         | 99.80%                             | 2                         | 2                        | 2                       | 0.02%                       | 4.33%                        | FDTSLRICK            | R                   | D               | 99.70%                                  | 31.25                 | 26                         | 0                                | 0                                | 0                                | 2                                | 1193.6237                   | 237                               | 246                 |                    |
| Testican-1                     | Q08629     | 49124.8         | 99.80%                             | 2                         | 2                        | 2                       | 0.02%                       | 4.33%                        | SLLGAFIPR            | K                   | C               | 99.70%                                  | 37.6                  | 25                         | 0                                | 0                                | 0                                | 2                                | 973.5830                    | 328                               | 336                 |                    |
| TGF-beta-induced protein ig-h3 | Q15582     | 74682.9         | 100.00%                            | 9                         | 13                       | 15                      | 0.13%                       | 17.70%                       | EDVYVFAPFTNEAFR      | R                   | A               | 99.70%                                  | 39                    | 25                         | 0                                | 1                                | 0                                | 0                                | 2                           | 1700.8278                         | 534                 | 548                |
| TGF-beta-induced protein ig-h3 | Q15582     | 74682.9         | 100.00%                            | 9                         | 13                       | 15                      | 0.13%                       | 17.70%                       | ELANLIK              | K                   | Y               | 99.10%                                  | 22.4                  | 26.2                       | 0                                | 1                                | 0                                | 0                                | 2                           | 800.4877                          | 564                 | 570                |
| TGF-beta-induced protein ig-h3 | Q15582     | 74682.9         | 100.00%                            | 9                         | 13                       | 15                      | 0.13%                       | 17.70%                       | FSLMLVAAGSAGLTETLNR  | R                   | E               | 99.70%                                  | 71.8                  | 25                         | 0                                | 2                                | 0                                | 2                                | 2038.0639                   | 515                               | 533                 |                    |
| TGF-beta-induced protein ig-h3 | Q15582     | 74682.9         | 100.00%                            | 9                         | 13                       | 15                      | 0.13%                       | 17.70%                       | GDLADSALEIRK         | Q                   | Q               | 99.70%                                  | 78.4                  | 25.6                       | 0                                | 1                                | 0                                | 0                                | 2                           | 1447.7004                         | 643                 | 655                |
| TGF-beta-induced protein ig-h3 | Q15582     | 74682.9         | 100.00%                            | 9                         | 13                       | 15                      | 0.13%                       | 17.70%                       | NLCIENSCIAAHDIR      | R                   | G               | 99.70%                                  | 27.7                  | 25                         | 0                                | 1                                | 1                                | 2                                | 1887.8801                   | 470                               | 485                 |                    |
| TGF-beta-induced protein ig-h3 | Q15582     | 74682.9         | 100.00%                            | 9                         | 13                       | 15                      | 0.13%                       | 17.70%                       | SLOQDKLEVLTK         | K                   | N               | 99.70%                                  | 61.7                  | 25                         | 0                                | 1                                | 1                                | 0                                | 2                           | 1316.7422                         | 591                 | 602                |
| TGF-beta-induced protein ig-h3 | Q15582     | 74682.9         | 100.00%                            | 9                         | 13                       | 15                      | 0.13%                       | 17.70%                       | SPYQLQISR            | K                   | L               | 99.70%                                  | 38.7                  | 25                         | 0                                | 0                                | 1                                | 0                                | 2                           | 1327.7117                         | 28                  | 38                 |
| TGF-beta-induced protein ig-h3 | Q15582     | 74682.9         | 100.00%                            | 9                         | 13                       | 15                      | 0.13%                       | 17.70%                       | STVISYECQGVPEK       | K                   | V               | 99.70%                                  | 53.8                  | 25                         | 0                                | 0                                | 0                                | 2                                | 1692.7245                   | 77                                | 90                  |                    |
| TGF-beta-induced protein ig-h3 | Q15582     | 74682.9         | 100.00%                            | 9                         | 13                       | 15                      | 0.13%                       | 17.70%                       | LYHGQITLTGGK         | K                   | K               | 99.70%                                  | 49.9                  | 25.5                       | 0                                | 1                                | 1                                | 0                                | 2                           | 1579.8117                         | 448                 | 461                |
| Thrombospondin-1               | P07996     | 129381.7        | 100.00%                            | 14                        | 14                       | 14                      | 0.14%                       | 15.30%                       | DCVGDYENQGNK         | K                   | Q               | 99.70%                                  | 85.5                  | 25                         | 0                                | 1                                | 0                                | 0                                | 2                           | 1651.7053                         | 530                 | 543                |
| Thrombospondin-1               | P07996     | 129381.7        | 100.00%                            | 14                        | 14                       | 14                      | 0.14%                       | 15.30%                       | DDDYAGFVFGYQSSSR     | R                   | F               | 99.70%                                  | 59.3                  | 25                         | 0                                | 0                                | 0                                | 2                                | 1813.7664                   | 1019                              | 1034                |                    |
| Thrombospondin-1               | P07996     | 129381.7        | 100.00%                            | 14                        | 14                       | 14                      | 0.14%                       | 15.30%                       | DNCQVYVVDGR          | R                   | D               | 99.70%                                  | 58.4                  | 25                         | 0                                | 1                                | 0                                | 0                                | 2                           | 1573.6700                         | 811                 | 822                |
| Thrombospondin-1               | P07996     | 129381.7        | 100.00%                            | 14                        | 14                       | 14                      | 0.14%                       | 15.30%                       | FQDLVDVIR            | K                   | A               | 99.70%                                  | 59.3                  | 26.8                       | 0                                | 0                                | 0                                | 2                                | 1062.5579                   | 75                                | 83                  |                    |
| Thrombospondin-1               | P07996     | 129381.7        | 100.00%                            | 14                        | 14                       | 14                      | 0.14%                       | 15.30%                       | FTGSQPFQGVGHATANK    | R                   | Q               | 99.70%                                  | 24.3                  | 25                         | 0                                | 0                                | 1                                | 2                                | 1875.8985                   | 624                               | 641                 |                    |
| Thrombospondin-1               | P07996     | 129381.7        | 100.00%                            | 14                        | 14                       | 14                      | 0.14%                       | 15.30%                       | PVFQITPEDILR         | R                   | N               | 99.70%                                  | 52.1                  | 25.2                       | 0                                | 1                                | 0                                | 0                                | 2                           | 1394.7316                         | 217                 | 228                |
| Thrombospondin-1               | P07996     | 129381.7        | 100.00%                            | 14                        | 14                       | 14                      | 0.14%                       | 15.30%                       | GFLLASLR             | K                   | Q               | 99.70%                                  | 44.1                  | 25                         | 0                                | 0                                | 1                                | 0                                | 2                           | 989.6143                          | 87                  | 95                 |
| Thrombospondin-1               | P07996     | 129381.7        | 100.00%                            | 14                        | 14                       | 14                      | 0.14%                       | 15.30%                       | GGVNDNFQGLQNVIR      | K                   | F               | 99.70%                                  | 69.9                  | 25.8                       | 0                                | 1                                | 0                                | 0                                | 2                           | 1616.8140                         | 202                 | 216                |
| Thrombospondin-1               | P07996     | 129381.7        | 100.00%                            | 14                        | 14                       | 14                      | 0.14%                       | 15.30%                       | GTLLALR              | R                   | K               | 99.70%                                  | 44.2                  | 26.1                       | 0                                | 0                                | 0                                | 2                                | 872.5201                    | 102                               | 109                 |                    |
| Thrombospondin-1               | P07996     | 129381.7        | 100.00%                            | 14                        | 14                       | 14                      | 0.14%                       | 15.30%                       | GTSDNDPMWVR          | K                   | H               | 99.70%                                  | 47.3                  | 25                         | 0                                | 0                                | 0                                | 2                                | 1372.6604                   | 969                               | 980                 |                    |
| Thrombospondin-1               | P07996     | 129381.7        | 100.00%                            | 14                        | 14                       | 14                      | 0.14%                       | 15.30%                       | IPESGGDNSVFDFELTGAAR | R                   | K               | 99.70%                                  | 81.1                  | 25                         | 0                                | 1                                | 0                                | 0                                | 2                           | 2195.0617                         | 21                  | 41                 |
| Thrombospondin-1               | P07996     | 129381.7        | 100.00%                            | 14                        | 14                       | 14                      | 0.14%                       | 15.30%                       | LQNNPTPQFGGK         | R                   | D               | 99.70%                                  | 40.2                  | 25.2                       | 0                                | 1                                | 0                                | 0                                | 2                           | 1332.6367                         | 518                 | 529                |
| Thrombospondin-1               | P07996     | 129381.7        | 100.00%                            | 14                        | 14                       | 14                      | 0.14%                       | 15.30%                       | SITVFGEDIR           | K                   | A               | 99.70%                                  | 49.8                  | 25.9                       | 0                                | 0                                | 0                                | 2                                | 1207.6318                   | 155                               | 164                 |                    |
| Thrombospondin-1               | P07996     | 129381.7        | 100.00%                            | 14                        | 14                       | 14                      | 0.14%                       | 15.30%                       | TIVITLQDSIR          | R                   | K               | 99.70%                                  | 43.7                  | 25                         | 0                                | 0                                | 1                                | 0                                | 2                           | 1246.7003                         | 289                 | 299                |
| Versican core protein          | P13611     | 372812.6        | 100.00%                            | 5                         | 5                        | 7                       | 0.06%                       | 1.50%                        | ACQGGQLGVR           | R                   | T               | 99.70%                                  | 38.2                  | 27.3                       | 0                                | 1                                | 0                                | 0                                | 2                           | 1087.5579                         | 313                 | 323                |
| Versican core protein          | P13611     | 372812.6        | 100.00%                            | 5                         | 5                        | 7                       | 0.06%                       | 1.50%                        | LATVGLQAAWR          | R                   | N               | 99.70%                                  | 88.4                  | 25.5                       | 0                                | 0                                | 0                                | 2                                | 1314.7165                   | 277                               | 288                 |                    |
| Versican core protein          | P13611     | 372812.6        | 100.00%                            | 5                         | 5                        | 7                       | 0.06%                       | 1.50%                        | LASDAQILR            | K                   | C               | 99.70%                                  | 65.7                  | 25.7                       | 0                                | 2                                | 0                                | 0                                | 2                           | 1078.5892                         | 120                 | 129                |
| Versican core protein          | P13611     | 372812.6        | 100.00%                            | 5                         | 5                        | 7                       | 0.06%                       | 1.50%                        | VEINSLR              | R                   | Y               | 99.70%                                  | 38.4                  | 25.2                       | 0                                | 1                                | 0                                | 0                                | 2                           | 1007.5520                         | 3315                | 3322               |
| Vimentin                       | P08670     | 53652.7         | 100.00%                            | 18                        | 20                       | 22                      | 0.18%                       | 41.20%                       | YTLVFAAQK            | R                   | A               | 99.70%                                  | 35.2                  | 25                         | 0                                | 2                                | 0                                | 0                                | 2                           | 1154.5946                         | 161                 | 170                |
| Vimentin                       | P08670     | 53652.7         | 100.00%                            | 18                        | 20                       | 22                      | 0.18%                       | 41.20%                       | DNLAEDIMR            | R                   | L               | 99.10%                                  | 21.8                  | 25                         | 0                                | 0                                | 0                                | 2                                | 1092.4992                   | 176                               | 184                 |                    |
| Vimentin                       | P08670     | 53652.7         | 100.00%                            | 18                        | 20                       | 22                      | 0.18%                       | 41.20%                       | EEAENTLOSFR          | R                   | Q               | 99.70%                                  | 43                    | 25                         | 0                                | 1                                | 0                                | 0                                | 2                           | 1323.6175                         | 197                 | 207                |
| Vimentin                       | P08670     | 53652.7         | 100.00%                            | 18                        | 20                       | 22                      | 0.18%                       | 41.20%                       | EMENFAVGAANYQDTQGR   | R                   | L               | 99.70%                                  | 52.1                  | 25                         | 0                                | 1                                | 0                                | 0                                | 2                           | 2202.9809                         | 346                 | 364                |
| Vimentin                       | P08670     | 53652.7         | 100.00%                            | 18                        | 20                       | 22                      | 0.18%                       | 41.20%                       | ETNLDSLPLVDTHSK      | R                   | R               | 99.70%                                  | 34.6                  | 25                         | 0                                | 1                                | 1                                | 0                                | 2                           | 1668.8441                         | 425                 | 439                |
| Vimentin                       | P08670     | 53652.7         | 100.00%                            | 18                        | 20                       | 22                      | 0.18%                       | 41.20%                       | FADLSEAAIR           | K                   | N               | 99.70%                                  | 46.8                  | 25.8                       | 0                                | 1                                | 0                                | 0                                | 2                           | 1093.5272                         | 295                 | 304                |
| Vimentin                       | P08670     | 53652.7         | 100.00%                            | 18                        | 20                       | 22                      | 0.18%                       | 41.20%                       | ILLAELEQIK           | K                   | Q               | 99.70%                                  | 56.1                  | 25                         | 0                                | 0                                | 0                                | 2                                | 1169.7142                   | 130                               | 139                 |                    |
| Vimentin                       | P08670     | 53652.7         | 100.00%                            | 18                        | 20                       | 22                      | 0.18%                       | 41.20%                       | ILLAELEQLKGGQK       | K                   | S               | 99.70%                                  | 45.5                  | 25                         | 0                                | 2                                | 0                                | 0                                | 2                           | 1539.9108                         | 130                 | 143                |
| Vimentin                       | P08670     | 53652.7         | 100.00%                            | 18                        | 20                       | 22                      | 0.18%                       | 41.20%                       | KVESLGEELAFIK        | R                   | K               | 99.70%                                  | 42                    | 25                         | 0                                | 1                                | 0                                | 0                                | 2                           | 1533.8524                         | 223                 | 235                |
| Vimentin                       | P08670     | 53652.7         | 100.00%                            | 18                        | 20                       | 22                      | 0.18%                       | 41.20%                       | LQDIYEEDIR           | R                   | E               | 99.70%                                  | 51.6                  | 25                         | 0                                | 1                                | 0                                | 0                                | 2                           | 1270.5622                         | 146                 | 155                |
| Vimentin                       | P08670     | 53652.7         | 100.00%                            | 18                        | 20                       | 22                      | 0.18%                       | 41.20%                       | NLQEAEEWYK           | K                   | S               | 99.70%                                  | 46.2                  | 25                         | 0                                | 0                                | 0                                | 2                                | 1309.6059                   | 283                               | 292                 |                    |
| Vimentin                       | P08670     | 53652.7         | 100.00%                            | 18                        | 20                       | 22                      | 0.18%                       | 41.20%                       | QVDVNSLAR            | R                   | L               | 99.70%                                  | 47.7                  | 25.8                       | 0                                | 1                                | 0                                | 0                                | 2                           | 1086.5331                         | 208                 | 217                |
| Vimentin                       | P08670     | 53652.7         | 100.00%                            | 18                        | 20                       | 22                      | 0.18%                       | 41.20%                       | QVYSVAQK             | R                   | N               | 99.90%                                  | 26                    | 25.9                       | 0                                | 1                                | 0                                | 0                                | 2                           | 1023.5105                         | 274                 | 282                |
| Vimentin                       | P08670     | 53652.7         | 100.00%                            | 18                        | 20                       | 22                      | 0.18%                       | 41.20%                       | QVOSLTCEVDALK        | R                   | G               | 99.70%                                  | 72.8                  | 26.1                       | 0                                | 2                                | 0                                | 0                                | 2                           | 1490.7521                         | 322                 | 334                |
| Vimentin                       | P08670     | 53652.7         | 100.00%                            | 18                        | 20                       | 22                      | 0.18%                       | 41.20%                       | SLYASSPGGVYATR       | R                   | S               | 99.70%                                  | 61.6                  | 25.2                       | 0                                | 1                                | 0                                | 0                                | 2                           | 1428.7117                         | 51                  | 64                 |
| Vimentin                       | P08670     | 53652.7         | 100.00%                            | 18                        | 20                       | 22                      | 0.18%                       | 41.20%                       | SVYITTSIR            | R                   | T               | 94.70%                                  | 21                    | 25                         | 0                                | 0                                | 0                                | 2                                | 914.4577                    | 29                                | 36                  |                    |
| Vimentin                       | P08670     | 53652.7         | 100.00%                            | 18                        | 20                       | 22                      | 0.18%                       | 41.20%                       | TNEKVELQGNLR         | R                   | F               | 99.70%                                  | 41.5                  | 25.9                       | 0                                | 0                                | 1                                | 0                                | 2                           | 1587.7974                         | 101                 | 113                |
| Vimentin                       | P08670     | 53652.7         | 100.00%                            | 18                        | 20                       | 22                      | 0.18%                       | 41.20%                       | TYSLGSALRPSISR       | R                   | S               | 97.80%                                  | 17.9                  | 25                         | 0                                | 0                                | 1                                | 0                                | 2                           | 1485.7863                         | 37                  | 50                 |
| Vimentin                       | P08670     | 53652.7         | 100.00%                            | 18                        | 20                       | 22                      | 0.18%                       | 41.20%                       | VELQELNDR            | K                   | F               | 99.70%                                  | 44.9                  | 25.2                       | 0                                | 1                                | 0                                | 0                                | 2                           | 1115.5692                         | 105                 | 113                |
