# Supplementary material for: Insulin-like growth factor binding proteins 4 and 7 released by senescent cells promote premature senescence in mesenchymal stem cells
Source: PubMed Central journal article supplement — Cell Death Dis. 2013 Nov 7;4(11):e911–. doi: 10.1038/cddis.2013.445 (PMC3847322; doi:10.1038/cddis.2013.445), 2013-11-07
Supplement: cddis2013445x5.pdf [file cddis2013445x5.pdf]

## Supplementary information

**Table S3.** Proteins commonly identified in CM-P1 and CM-P10 secretome by high resolution LC-MS/MS. The higher number of unique peptides for each protein identification is reported. Mr, Relative molecular mass.

| Accession | Protein name                                             | Mr (kDa) | # Pep | Secretome P* | Signal P** |
|-----------|----------------------------------------------------------|----------|-------|--------------|------------|
| P08253    | 72 kDa type IV collagenase                               | 74       | 9     | 0.51         | Y          |
| P11021    | 78 kDa glucose-regulated protein                         | 72       | 8     | 0.75         | Y          |
| P07355    | Annexin A2                                               | 39       | 7     | 0.75         | N          |
| P13497    | Bone morphogenetic protein 1                             | 111      | 2     | 0.47         | Y          |
| O43852    | Calumenin                                                | 37       | 8     | 0.75         | Y          |
| Q76M96    | Coiled-coil domain-containing protein 80                 | 108      | 5     | 0.21         | Y          |
| P02452    | Collagen alpha-1(I) chain                                | 139      | 49    | 0.21         | Y          |
| P02462    | Collagen alpha-1(IV) chain                               | 161      | 3     | 0.04         | Y          |
| P20908    | Collagen alpha-1(V) chain                                | 184      | 3     | 0.05         | Y          |
| P05997    | Collagen alpha-2(V) chain                                | 145      | 8     | 0.08         | Y          |
| P07585    | Decorin                                                  | 40       | 4     | 0.51         | Y          |
| P02751    | Fibronectin                                              | 263      | 52    | 0.37         | Y          |
| P23142    | Fibulin-1                                                | 77       | 3     | 0.59         | Y          |
| Q12841    | Follistatin-related protein 1                            | 35       | 6     | 0.53         | Y          |
| P09382    | Galectin-1                                               | 15       | 4     | 0.35         | N          |
| P07093    | Glia-derived nexin                                       | 44       | 5     | 0.69         | Y          |
| P18065    | Insulin-like growth factor-binding protein 2             | 35       | 4     | 0.89         | Y          |
| P17936    | Insulin-like growth factor-binding protein 3             | 32       | 6     | 0.82         | Y          |
| Q14767    | Latent-transforming growth factor beta-binding protein 2 | 195      | 10    | 0.40         | Y          |
| P01033    | Metalloproteinase inhibitor 1                            | 23       | 5     | 0.77         | Y          |
| Q02818    | Nucleobindin-1                                           | 54       | 6     | 0.31         | Y          |
| P26022    | Pentraxin-related protein PTX3                           | 42       | 8     | 0.76         | Y          |
| P98160    | Perlecan                                                 | 469      | 4     | 0.44         | Y          |
| P05121    | Plasminogen activator inhibitor 1                        | 45       | 3     | 0.64         | Y          |
| P07237    | Protein disulfide-isomerase                              | 57       | 4     | 0.68         | Y          |
| P28300    | Protein-lysine 6-oxidase                                 | 47       | 4     | 0.64         | Y          |
| P50454    | Serpin H1                                                | 46       | 5     | 0.86         | Y          |
| P09486    | SPARC                                                    | 35       | 10    | 0.94         | Y          |
| Q08629    | Testican-1                                               | 49       | 2     | 0.27         | Y          |
| Q15582    | TGF-beta-induced protein ig-h3                           | 75       | 9     | 0.45         | Y          |
| P07996    | Thrombospondin-1                                         | 129      | 14    | 0.35         | Y          |
| P13611    | Versican core protein                                    | 373      | 5     | 0.46         | Y          |
| P02461    | Collagen alpha-1(III) chain                              | 139      | 6     | 0.26         | Y          |

\* Secretion prediction according to Secretome P 2.0 server. Proteins with NN-score $\geq$ 0.5 are predicted as secreted by non-classical secretory pathways.

\*\* Secretion prediction according to signal peptide probability of Signal P 4.0 server. Y and N indicate the presence or absence of the signal peptide for secretion.
